# Supplementary material for: The Identification and Role of the Key Mycotoxin of Pestalotiopsis kenyana Causing Leaf Spot Disease of Zanthoxylum schinifolium
Source: MDPI journal article supplement (doi:10.3390/jof9121194), 2023-12-13
Supplement: s1 [file s1]

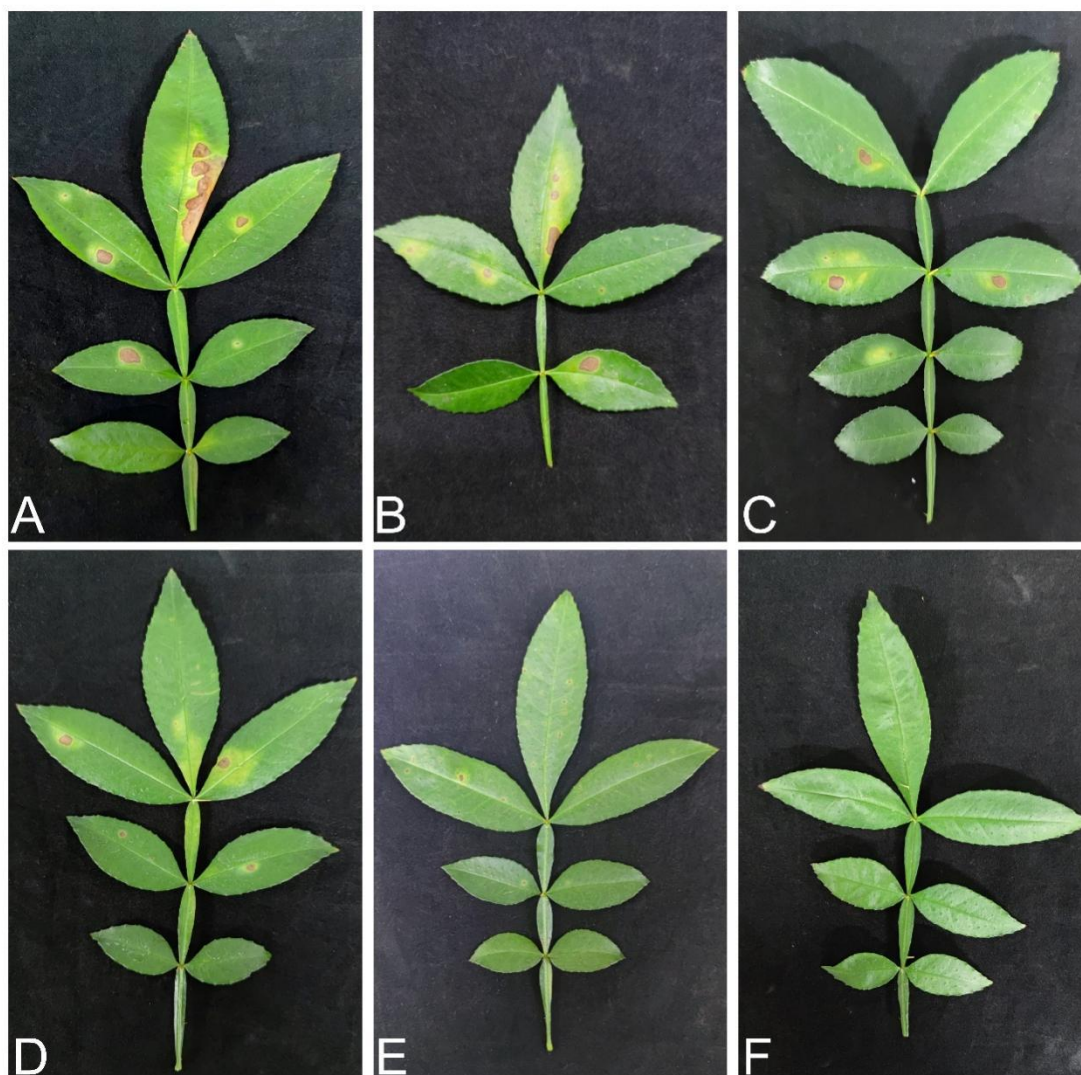

**Figure S3.** The incidence of PK-3 mycotoxin application of *Z. schinifolium* 5d  
 A, 10 µg/mL mycotoxin; B, 20 µg/mL mycotoxin; C, 40 µg/mL mycotoxin; D, 80 µg/mL  
 mycotoxin; E,  $1 \times 10^6$  cfu / ml pathogen spore suspension; F, sterile water
