# Supplementary material for: The Identification and Role of the Key Mycotoxin of Pestalotiopsis kenyana Causing Leaf Spot Disease of Zanthoxylum schinifolium
Source: MDPI journal article supplement (doi:10.3390/jof9121194), 2023-12-13
Supplement: s1 [file s1]

**Table S1.** The ratio of developing agents

| Solvent                                         | proportion                         |
|-------------------------------------------------|------------------------------------|
| Petroleum ether: ethyl acetate                  | 2:1; 4:1; 6:1; 8:1; 10:1           |
| Petroleum ether: isoamyl alcohol                | 2:1; 4:1; 6:1; 8:1; 10:1           |
| Petroleum ether: ethyl acetate: dichloromethane | 1:2:1; 1:4:1; 1:6:1; 1:8:1; 1:10:1 |
| Ethyl acetate: ice acetic acid: dichloromethane | 2:1:1; 4:1:1; 6:1:1; 8:1:1; 10:1:1 |
| Ethyl acetate: glacial acetic acid: cyclohexane | 2:1:1; 4:1:1; 6:1:1; 8:1:1; 10:1:1 |
| Ethyl acetate: glacial acetic acid: hexane      | 2:1:1; 4:1:1; 6:1:1; 8:1:1; 10:1:1 |
| n-Butanol: glacial acetic acid: dichloromethane | 2:1:1; 4:1:1; 6:1:1; 8:1:1; 10:1:1 |
| n-Butanol: glacial acetic acid: petroleum ether | 2:1:1; 4:1:1; 6:1:1; 8:1:1; 10:1:1 |
| n-Butanol: glacial acetic acid                  | 2:1; 4:1; 6:1; 8:1; 10:1           |
