# Supplementary material for: The Identification and Role of the Key Mycotoxin of Pestalotiopsis kenyana Causing Leaf Spot Disease of Zanthoxylum schinifolium
Source: MDPI journal article supplement (doi:10.3390/jof9121194), 2023-12-13
Supplement: s1 [file s1]

**Table S2.** Ammonium sulfate fractional precipitation toxicity test results.

| Saturation (%) | Fraction      | Time(h) |    |     |
|----------------|---------------|---------|----|-----|
|                |               | 48      | 96 | 144 |
| 20             | Supernatant   | +       | +  | +   |
|                | Precipitation | -       | -  | -   |
| 30             | Supernatant   | +       | +  | +   |
|                | Precipitation | -       | -  | -   |
| 40             | Supernatant   | +       | +  | +   |
|                | Precipitation | -       | -  | -   |
| 50             | Supernatant   | +       | +  | +   |
|                | Precipitation | -       | -  | -   |
| 60             | Supernatant   | +       | +  | +   |
|                | Precipitation | -       | -  | -   |
| 70             | Supernatant   | +       | +  | +   |
|                | Precipitation | -       | -  | -   |
| 80             | Supernatant   | +       | +  | +   |
|                | Precipitation | -       | -  | -   |

Note: Saturation: Saturation of ammonium sulfate; ' - ' in the table indicates no obvious symptoms; ' + ' means that the leaves have lesion.
