# Supplementary material for: The Identification and Role of the Key Mycotoxin of Pestalotiopsis kenyana Causing Leaf Spot Disease of Zanthoxylum schinifolium
Source: J Fungi (Basel). 2023 Dec 13;9(12):1194. doi: 10.3390/jof9121194 (PMC10744368; doi:10.3390/jof9121194)
Supplement: Supplementary file 1 [file jof-09-01194-s001.zip]

Archive with 5 entries (5 files):
- Figure S1. Flow figure of the experiment.pdf
- Figure S2. Thin layer chromatography detection diagram.pdf
- Figure S3. The incidence of PK-3 mycotoxin application of Z. schinifolium 5d.pdf
- Table S1. The ratio of developing agents.pdf
- Table S2. Ammonium sulfate fractional precipitation toxicity test results.pdf
