# Supplementary figures and images for: The Identification and Role of the Key Mycotoxin of Pestalotiopsis kenyana Causing Leaf Spot Disease of Zanthoxylum schinifolium
Source: MDPI journal article supplement (doi:10.3390/jof9121194), 2023-12-13

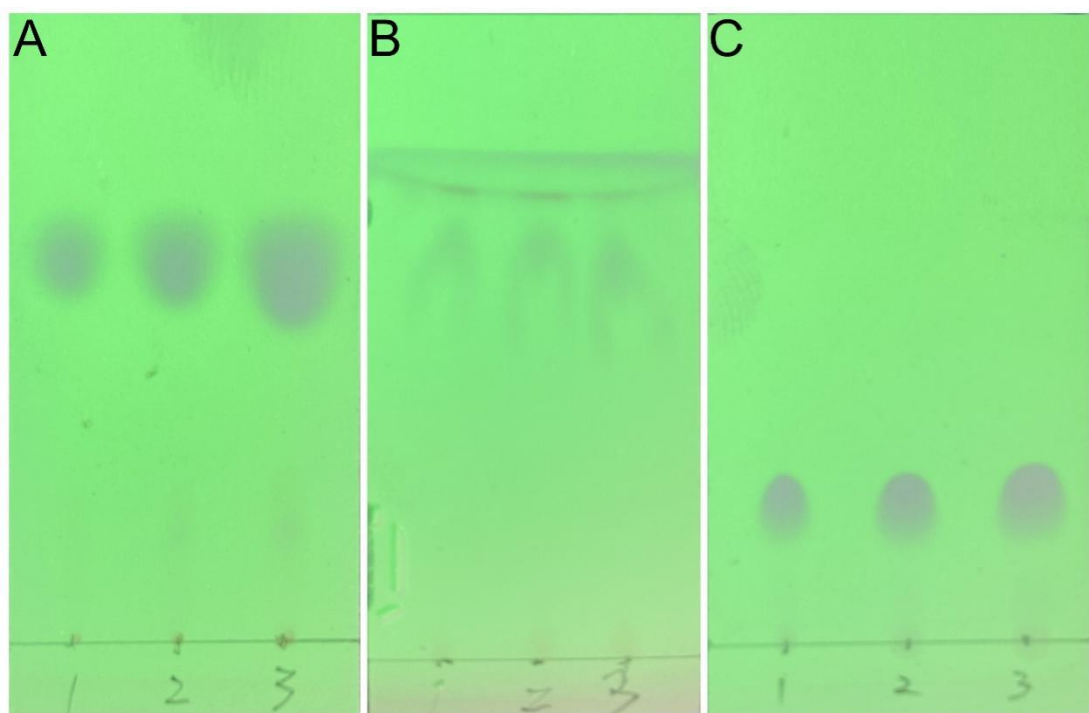

**Figure S2.** Thin layer chromatography detection diagram

A, PK-1; B, PK-2; C, PK-3

Supplement: s1 [file s1]

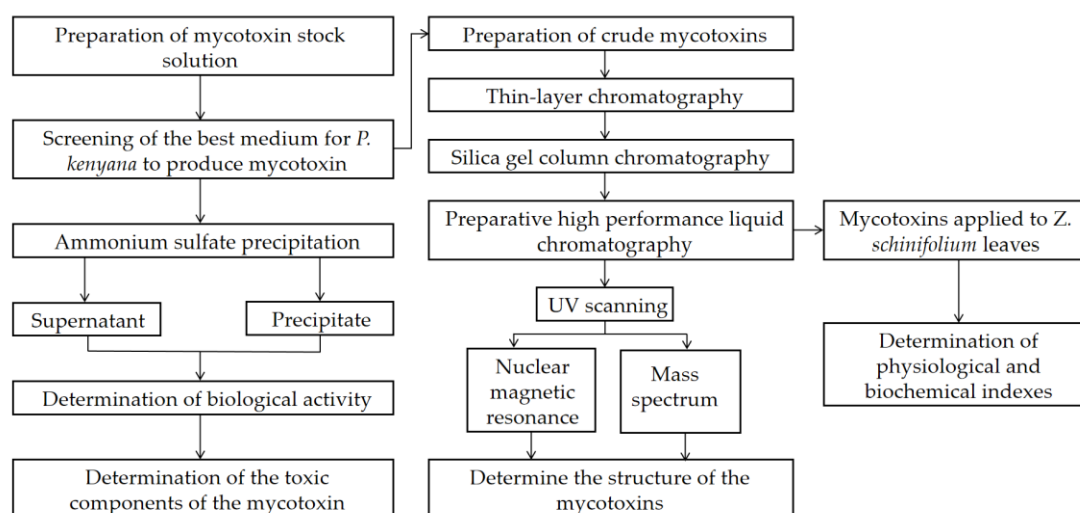

**Figure S1.** Flow figure of the experiment

Supplement: s1 [file s1]
